# Supplementary material for: NiO/NixCo3−xO4 porous ultrathin nanosheet/nanowire composite structures as high-performance supercapacitor electrodes
Source: Royal Society of Chemistry journal article supplement (doi:10.1039/c8ra04827d), 2018-01-01
Supplement: c8ra04827d1.pdf [file c8ra04827d1.pdf]

# Supplementary Material for $\text{NiO}/\text{Ni}_x\text{Co}_{3-x}\text{O}_4$ porous ultrathin nanosheet/nanowire composite structures as high-performance supercapacitor electrodes

Dongkai Jiang<sup>a</sup>, Maojun Zheng<sup>a,b,\*</sup>, Yuxiu You<sup>a</sup>, Ligu Ma<sup>a</sup>, Pengjie Liu<sup>a</sup>, Fanggang Li<sup>a</sup>, Hao

Yuan<sup>a</sup>, Zhihao Zhai<sup>a</sup>, Li Ma<sup>c</sup> and Wenzhong Shen<sup>a</sup>

*a* Key Laboratory of Artificial Structure and Quantum Control, Ministry of Education, School of Physics and Astronomy, Shanghai Jiao Tong University, Shanghai, 200240, PR China.

*b* Collaborative Innovation Center of Advanced Microstructures, Nanjing University, Nanjing, 210093, PR China.

*c* School of Chemistry and Chemical Technology, Shanghai Jiao Tong University, Shanghai, 200240, PR China.

\*Corresponding author Fax: +86-021-54741040, E-mail: mjzheng@sjtu.edu.cn (M. Zheng)

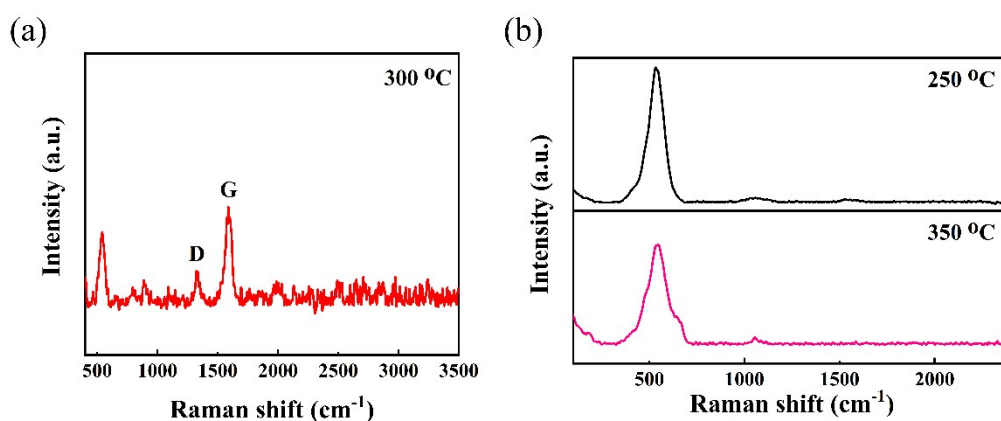

**Fig.S1 a** Raman spectra of the  $\text{NiO}/\text{Ni}_x\text{Co}_{3-x}\text{O}_4$  nanosheet/nanowire composite annealed at 300 °C  
**b** Raman spectra of the  $\text{NiO}/\text{Ni}_x\text{Co}_{3-x}\text{O}_4$  nanosheet/nanowire composite annealed at 250 °C and 350 °C

**Table S1** The Cobalt content of the samples.

| Annealing temperature (°C) | Mass percentages of Cobalt (%) |
|----------------------------|--------------------------------|
| 250                        | 0.202                          |
| 300                        | 0.268                          |
| 350                        | 0.387                          |

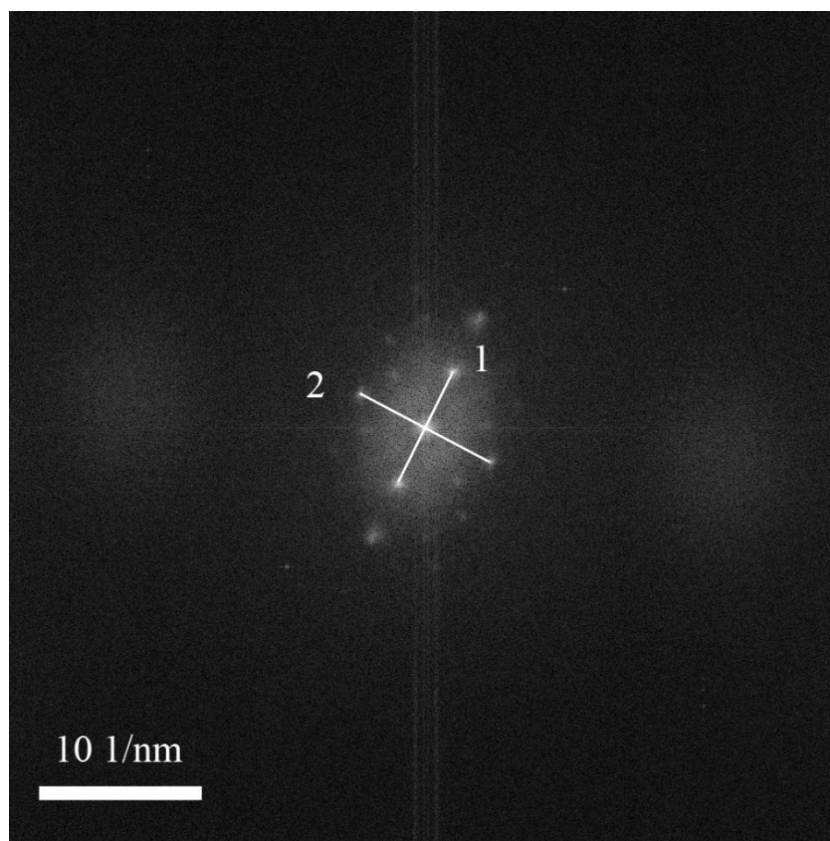

**Fig.S2** FFT pattern corresponding to the HRTEM image of the NiO/Ni<sub>x</sub>Co<sub>3-x</sub>O<sub>4</sub> porous nanosheets

**Table S2** The lattice spacing calculated from FFT pattern(nanosheet)

| Line Number | Calculated Spacing | Lattice Plane |
|-------------|--------------------|---------------|
| 1           | 2.639 Å            | (220) 2.882 Å |
| 2           | 2.213 Å            | (222) 2.350 Å |

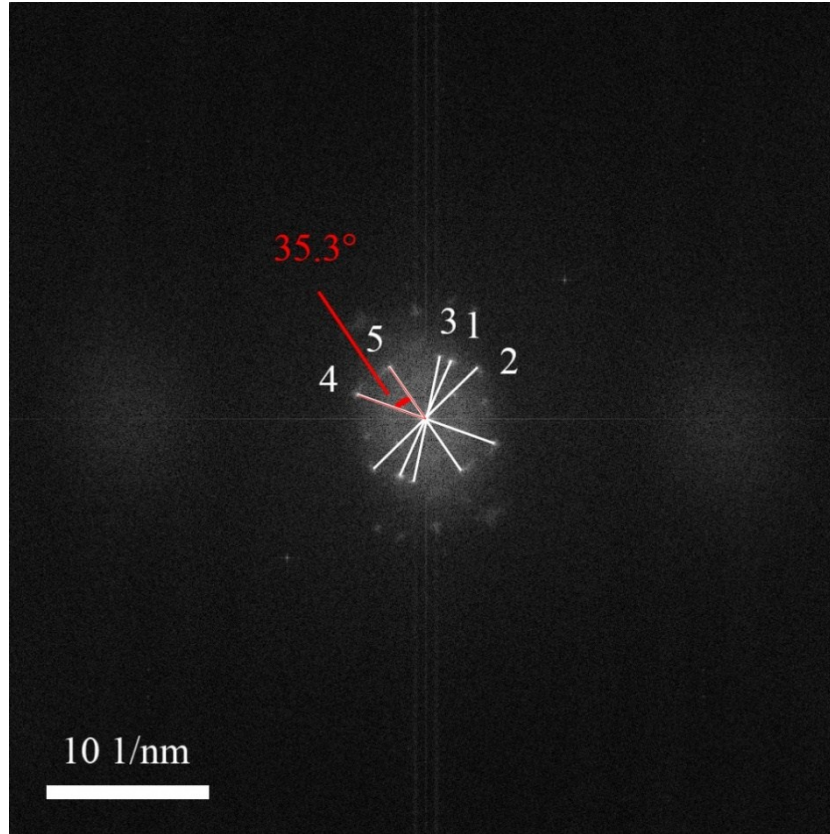

**Fig.S3** FFT pattern corresponding to the HRTEM image of the NiO/Ni<sub>x</sub>Co<sub>3-x</sub>O<sub>4</sub> porous nanowires

**Table S3** The lattice spacing calculated from FFT pattern(nanowire)

| Line Number | Calculated Spacing | Lattice Plane |
|-------------|--------------------|---------------|
| 1           | 2.577 Å            | (220) 2.882 Å |
| 2           | 2.238 Å            | (222) 2.350 Å |
| 3           | 2.548 Å            | (220) 2.882 Å |
| 4           | 2.246 Å            | (222) 2.350 Å |
| 5           | 2.585 Å            | (220) 2.882 Å |

For cubic crystals, we have

$$\cos \Phi = \frac{h_1 h_2 + k_1 k_2 + l_1 l_2}{\sqrt{h_1^2 + k_1^2 + l_1^2} \sqrt{h_2^2 + k_2^2 + l_2^2}} \quad (\text{S1})$$

where  $\Phi$  is the angle between two crystal faces ( $h_1, k_1, l_1$ ) and ( $h_2, k_2, l_2$ ).

Therefore, the angle between two crystal faces (220) and (222) is equal to 35.26° which is fit well with the measured value 35.3°.
